# Supplementary material for: The Relative Roles of Climate Variation and Human Activities in Vegetation Dynamics in Coastal China from 2000 to 2019
Source: MDPI journal article supplement (doi:10.3390/rs14102485), 2022-05-22
Supplement: s1 [file s1]

Supplemental Material

# The relative roles of climate variation and human activities in vegetation dynamics in coastal China from 2000 to 2019

Honglei Jiang <sup>1,2</sup>, Xia Xu <sup>1,2\*</sup>, Tong Zhang <sup>1,2</sup>, Haoyu Xia <sup>1,2</sup>, Yiqin Huang <sup>1,2</sup>, Shirong Qiao <sup>1,2</sup>

<sup>1</sup> State Key Laboratory of Earth Surface Processes and Resource Ecology, Beijing Normal University, Beijing 100875, China, 202021051112@mail.bnu.edu.cn (T.Z.); jianghonglei@mail.bnu.edu.cn (H.J.); 202021051106@mail.bnu.edu.cn (S. Q.); 202121051111@mail.bnu.edu.cn (H. Y.); 202121051102@mail.bnu.edu.cn (Y. H.);

<sup>2</sup> School of Natural Sciences, Faculty of Geographical Science, Beijing Normal University, Beijing 100875, China

\* Correspondence: xuxia@bnu.edu.cn

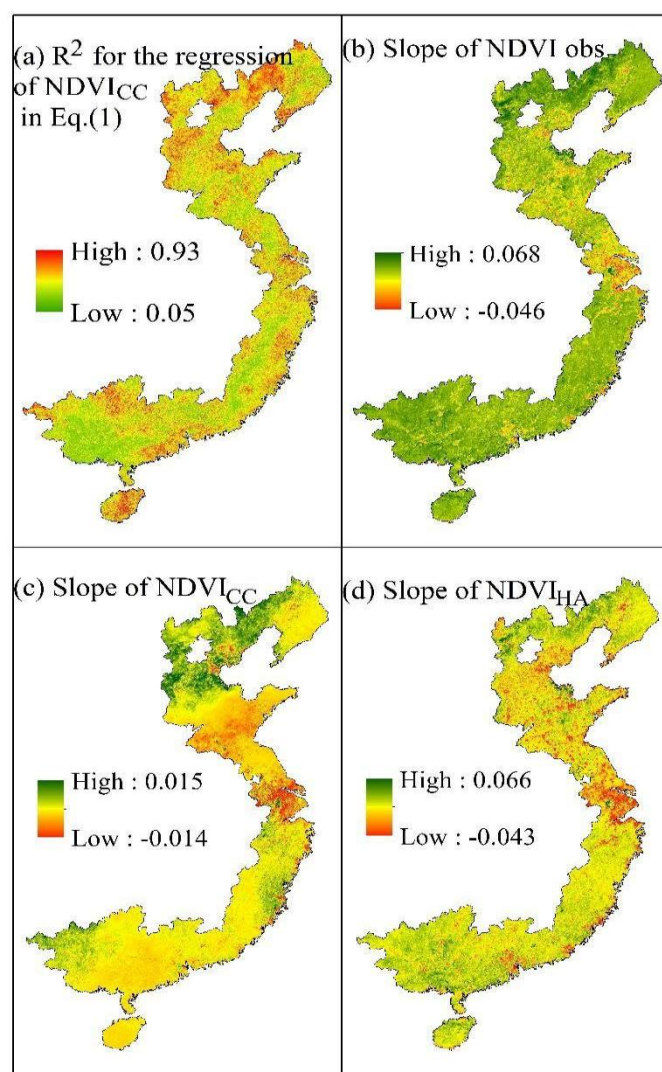

**Figure S1.** The details on calculation for Eq. (2) and Eq. (3); (a) represents the R square for NDVI<sub>CC</sub> calculation in Eq. (2); (b), (c) and (d) represents the  $SLOP_{obs}$ ,  $SLOP_{CC}$  and  $SLOP_{HA}$ , retrospectively. .
